# Supplementary material
Source: MDPI journal article supplement (https://www.mdpi.com/2813-6640/1/1/5)

## Raspberry Pi Connector

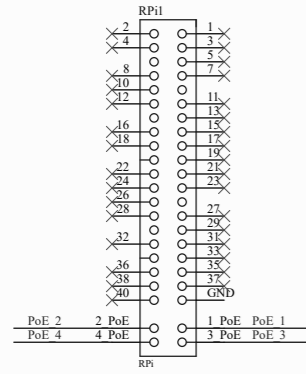

### Ideal Diode Controller

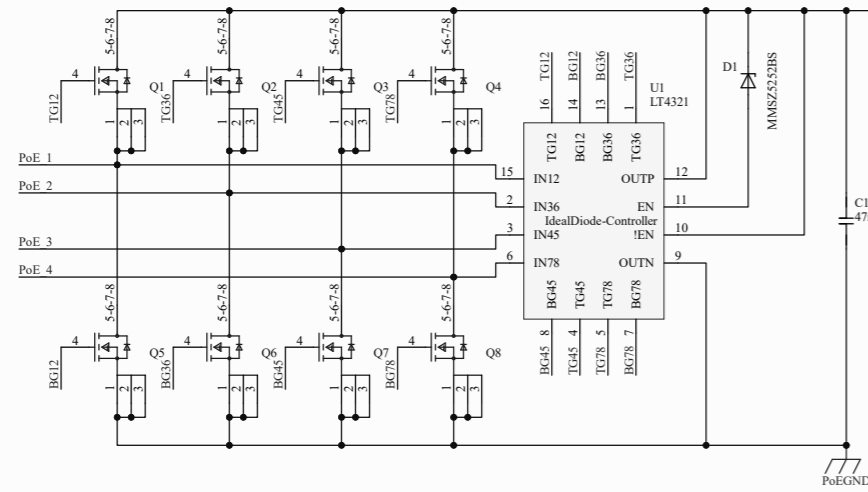

## PoE Controller

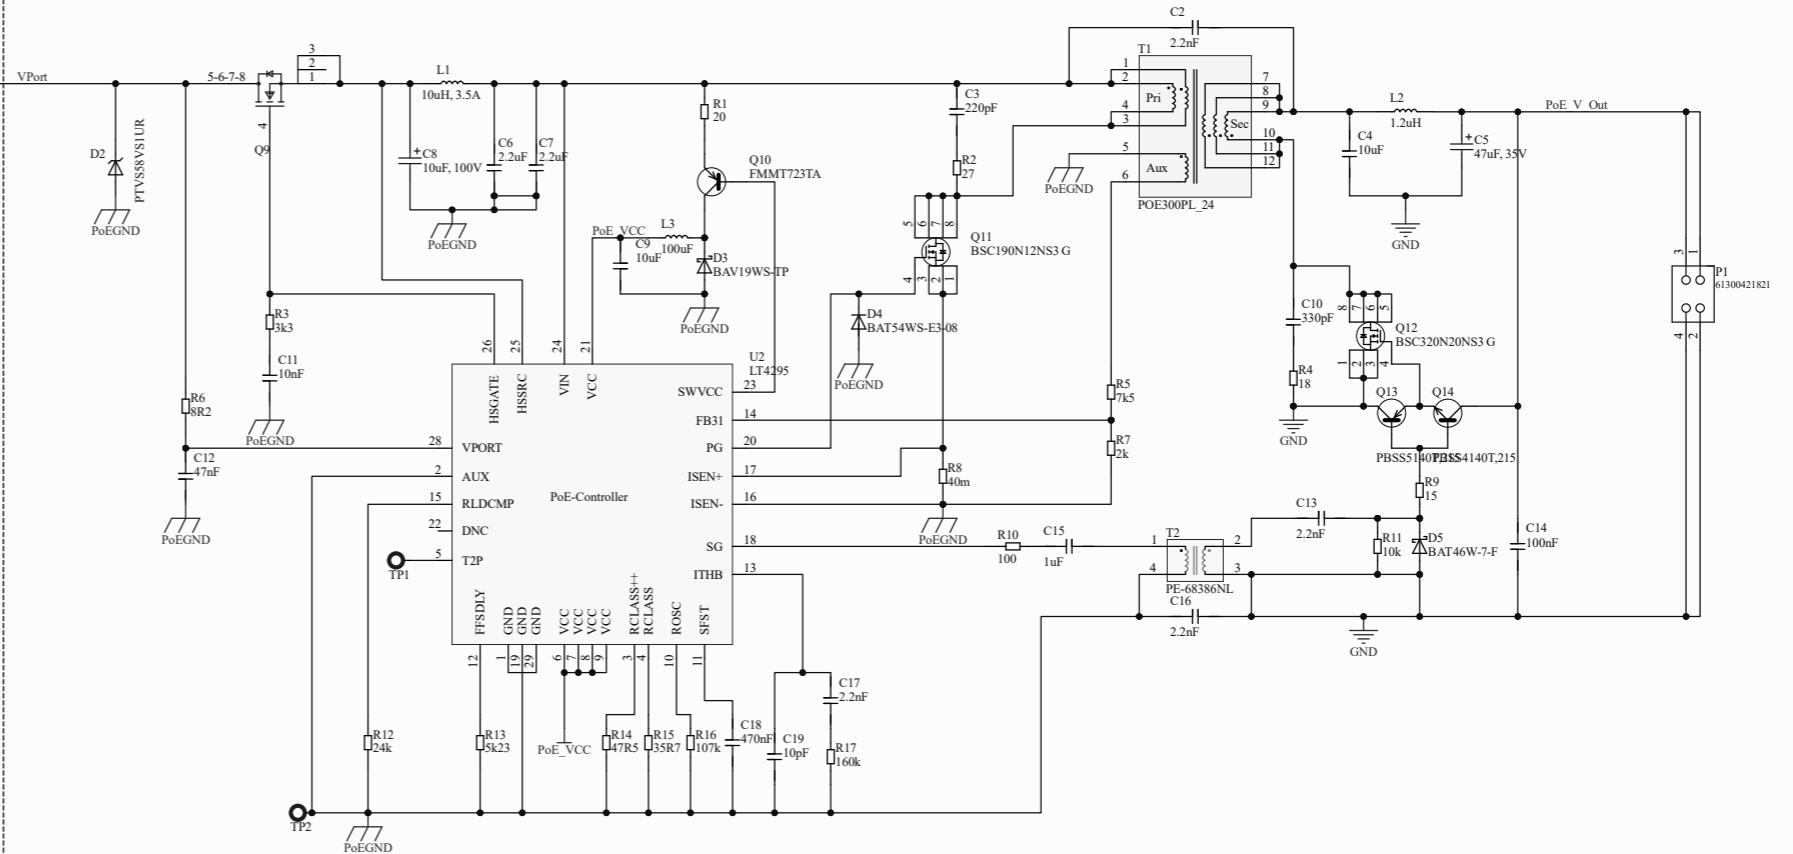

Supplement: s1 [file s1]
